# Supplementary material
Source: publisher figshare collection journal article supplement (https://tandf.figshare.com/ndownloader/files/18543455)
Supplement: Supplementary file 1 [file 18543455]

Supplemental Materials

A PBPK model to study the transfer of α-hexabromocyclododecane (α-HBCDD) to tissues of fast- and slow-growing broilers

Bertrand Médaa, Angélique Travelb, Yann Guyotb, Jérôme Henric, Eric Royerd,e, Elisabeth Baézaa and Catherine Jondrevillee

aBOA, INRA, Université de Tours, 37380 Nouzilly, France; bUMT BIRD, ITAVI, 37380 Nouzilly, France; cLaboratoire de Fougères, ANSES, 35133 Javené, France; dIFIP Institut du Porc, 31500 Toulouse, France; eINRA Nancy Champenoux, 54280 Champenoux, France* Current address: IDELE, 31321 Castanet- Tolosan, France

Corresponding author: Bertrand Méda, [bertrand.meda@inra.fr](mailto:bertrand.meda@inra.fr)

Institut National de la Recherche Agronomique (INRA), Unité Mixte de Recherche Biologie des Oiseaux et Aviculture (UMR BOA), 37380 Nouzilly, France

Content

[Body weight and feed ingestion 2](#_Toc16071783)

[Growth of breast muscles, leg muscles, liver and blood 2](#_Toc16071784)

[Body lipids deposition and growth of storage fat (separable fat depots + skin) 3](#_Toc16071785)

[Concentration of total and neutral lipids in the tissues 6](#_Toc16071786)

[Hematocrit, perfusion rate of the tissues and cardiac blood flow 6](#_Toc16071787)

[S3: Sensitivity analysis 8](#_Toc16071788)

[S4: Evaluation of the model 11](#_Toc16071789)

[S5: Comparison of the two strains 13](#_Toc16071790)

[S6: Impact of the duration and source of α-HBCDD exposure 14](#_Toc16071791)

[References 15](#_Toc16071792)

**S1: Literature review for the parameterisation of the model**

A set of parameters was established separately for fast-(FG) and slow-(SG) growing broilers. When the information was available, males (M), females (F) and as hatched (M&F) broilers were separately considered.

## Body weight and feed ingestion

Body weight at hatch (BW1, kg) and at slaughter (BW2, kg), age at slaughter (Age2, d), body weight (BW, kg) according to age (Age, d) and feed ingested daily (D Feed Ing, kg d-1) according to BW were parameterised using the data provided by breeders for Cobb 500 (Cobb-Vantress, 2017) and JA 657 (SARL Willems, 2017) for FG and SG broilers, respectively (Table S2.1).

Table S1.1: Parameters relative to body weight (BW, kg) and daily feed inestion (D Feed Ing, kg d-1)1

| Parameter2 | Unit | References | Strains | M | F | M&F |
| --- | --- | --- | --- | --- | --- | --- |
| **FAST-GROWING** | | | | | | |
| Age1 | d | Cobb-Vantress (2017) | Cobb 500 | 0 | 0 | 0 |
| BW1 | kg | 0.042 | 0.042 | 0.042 |
| Age2 | d | 42 | 42 | 42 |
| BW2 | kg | 3.09 | 2.71 | 2.90 |
| Bgomp | d-1 | 0.0439 | 0.047 | 0.0453 |
| a intake | Dl | 0.301 | 0.245 | 0.273 |
| b intake | Dl | 0.513 | 0.612 | 0.556 |
| **SLOW-GROWING** | | | | | | |
| Age1 | d | SARL Willems (2017) | JA 657 | 0 | 0 | 0 |
| BW1 | kg | 0.05 | 0.05 | 0.05 |
| Age2 | d | 84 | 84 | 84 |
| BW2 | kg | 2.46 | 1.95 | 2.20 |
| Bgomp | d-1 | 0.0284 | 0.0293 | 0.0287 |
| a intake | Dl | 0.141 | 0.152 | 0.145 |
| b intake | Dl | 0.916 | 0.939 | 0.942 |

1 The equations are:    (Méda et al., 2014) and

2 **Age1**, Initial age; **Age2**, Final age; **BW1**, Initial body weight; **BW2**, Final body weight; **Bgomp**, Growth rate at the inflection point of the Gompertz BW growth function (Precocity parameter); **a intake**, Slope of the allometric relationship between feed intake and body weight; **b intake**, Intercept of the allometric relationship between daily feed intake and body weight

## Growth of breast muscles, leg muscles, liver and blood

Data are presented in table S1.2.

Depending of the reference, the weight of breast and leg may include or not bone and skin. Besides, some data provide the weight of one muscle alone or consider only one part of the tissue (e.g. thigh or drumstick). Therefore, to adjust the allometric relationships between breast muscles and leg muscles some literature data were modified according to the following rules: breast is made of 70% meat (muscle), 20% bone and 10% skin (Shahin et al., 2005; Haïtook, 2006) and *Pectoralis major* represents 83% of breast muscles (Alnahhas et al., 2016; Tickle et al., 2014); leg is made of 65% meat (muscle), 25% bone and 10% skin, with 55% thigh and 45% drumstick (bone and skin included) (Shahin et al., 2005; Haïtook, 2006). Only data relative to the weight of the liver and the blood in FG broilers was available; it was applied to the two strains.

## Body lipids deposition and growth of storage fat (separable fat depots + skin)

Data are presented in tables S1.2 for body lipids deposition and S1.3 for storage fat growth.

In the current study, we define storage fat as a group of fatty tissues including separable fat depots (SFD), which gather abdominal, mesenteric, sartorial, gizzard, neck fat depots and skin. The growth of these fatty tissues was modelled in three successive steps. First, parameters of the allometric relationship between the weight of body lipids and body weight were adjusted for each strain. Secondly, an allometric relationship between the weight of abdominal fat and of body lipids was adjusted. Finally, the weight of SFD is estimated at 2 times the weight of abdominal fat (Ricard et al.,1983; de Crespo and Esteve-Garcia, 2002a) and the weight of skin at 2 times the weight of SFD (Haïtook, 2006) (i.e. 4 times the weight of abdominal fat). At the end, the weight of storage fat, is 6 times the weight of abdominal fat, the proportion of skin being 66% (prop Skin).

Table S1.2: Parameters relative to the allometric relationship between breast muscles, leg muscles, liver and blood weight (W Tissue, kg)1 or body lipids weight (W BL, kg)2 and body weight (BW, kg)

| Sex | References | Data | |  | a tissue or a BL | | |  | b tissue or b BL | | |  | *P* Sex |
| --- | --- | --- | --- | --- | --- | --- | --- | --- | --- | --- | --- | --- | --- |
| Type | Number |
| **FAST-GROWING** | | | | | | | | | | | | | |
| **Breast muscles** | |  |  |  |  |  |  |  |  |  |  |  |  |
| F | Danisman and Gous (2013) | Individuals | 31 |  | 1.30 | ±0.01 | *** |  | -1.96 | ±0.01 | *** |  | *0.41* |
| M | 29 |  |  |  |
| **Leg muscles** | |  |  |  |  |  |  |  |  |  |  |  |  |
| F | Danisman and Gous (2013) | Individuals | 32 |  | 1.06 | ±0.00 | *** |  | -1.99 | ±0.01 | *** |  | *0.29* |
| M | 32 |  |  |  |
| **Body lipids** | |  |  |  |  |  |  |  |  |  |  |  |  |
| F | Danisman and Gous (2013) | Individuals | 22 |  | 1.25 | ±0.04 | *** |  | -2.22 | ±0.03 | *** |  | ***** |
| M | 21 |  | 1.19 | ±0.02 | *** |  | -2.33 | ±0.02 | *** |  |
| M&F | 43 |  | 1.21 | ±0.06 | *** |  | -2.32 | ±0.04 | *** |  |  |
| **SLOW-GROWING** | | | | | | | | | | | | | |
| **Breast muscles** | |  |  |  |  |  |  |  |  |  |  |  |  |
| F | Eleroglu et al. (2014); Méda et al. (2015) | Means | 21 |  | 1.17 | ±0.07 | *** |  | -2.47 | ±0.06 | *** |  | *Not assessed* |
| M | 21 |  |  |  |
| **Leg muscles** | |  |  |  |  |  |  |  |  |  |  |  |  |
| F | Eleroglu et al. (2014); Méda et al. (2015) | Means | 21 |  | 1.15 | ±0.02 | *** |  | -1.99 | ±0.02 | *** |  | *Not assessed* |
| M | 21 |  |  |  |
| M&F | Aderibigbe et al. (2013); Fanatico et al. (2005); Küçükyılmaz et al. (2014) | 12 |  |  |  |
| **Body lipids** | |  |  |  |  |  |  |  |  |  |  |  |  |
| F | Carrasco et al. (2014); Henn et al. (2014) | Mean | 12 |  | 1.31 | ±0.02 | *** |  | -2.13 | ±0.03 | *** |  | **** |
| M | 12 |  | 1.21 | ±0.02 | *** |  | -2.26 | ±0.03 | *** |  |
| M&F | 24 |  | 1.26 | ±0.02 | *** |  | -2.2 | ±0.02 | *** |  |  |
| **FAST & SLOW-GROWING** | | | | | | | | | | | | | |
| **Liver** | |  |  |  |  |  |  |  |  |  |  |  |  |
| F | Danisman and Gous (2013) | Individuals | 27 |  | 0.79 | ±0.02 | *** |  | -3.55 | ±0.02 | *** |  | *0.59* |
| M | 26 |  |  |  |
| **Blood** |  |  |  |  |  |  |  |  |  |  |  |  |  |
| F | Medway and Kare (1959) | Means | 8 |  | 0.84 | ±0.02 | *** |  | -2.6 | ±0.02 | ******* |  | *0.84* |

1The equation is:

2The equation is:

Table S1.3: Parameters relative to the allometric relationship between the weight of abdominal fat (W AF, kg) and the weight of body lipids (W BL, kg)1

| Sex | References | Data | |  | a AF | | |  | b AF | | |  | *P* Sex |
| --- | --- | --- | --- | --- | --- | --- | --- | --- | --- | --- | --- | --- | --- |
| Type | Number |  |  |
| **FAST-GROWING** | | | | | | | | | | | | | |
| F | Crespo and Esteve-Garcia (2002a); Grisoni et al. (1990) | Means | 8 |  | 1.44 | ±0.04 | *** |  | -1.36 | ±0.10 | *** |  | *0.19* |
| M | Alleman et al. (2000); Cherry et al. (1987); Gereart et al. (1990); Gereart et al. (1993); Grisoni et al. (1990); Leclercq (1983); Pym et al. (2004) | 35 |
| **SLOW-GROWING** | | | | | | | | | | | | | |
| F | Eleroglu et al. (2014); Méda et al. (2015); Wang et al. (2013) | Means | 20 |  | 1.66 | ±0.06 | *** |  | -0.94 | ±0.11 | *** |  | *0.29* |
| M | Eleroglu et al. (2014); Jondreville et al. (2017); Méda et al. (2015) | Means | 20 |  |  |  |

1The equation is:

The weight of Storage fat (Separable fat depots + Skin) is 6 times the weight of abdominal fat. It is calculated as , with a Storagefat = a AF and b Storagefat = ln(6)+ b. Storage fat is made of 66% Skin (prop Skin) and 34% SFD (1 - prop Skin)

## Concentration of total and neutral lipids in the tissues

Data are presented in tables S1.4.

Unfortunately, except for blood, the kinetics of lipids concentration, and *a fortiori* the proportion of classes of lipids (tryglycerides, free and esterified cholesterol, phospholipids), in tissues of broilers from hatching to slaughter is almost inexistent in literature. Therefore, we used the data from the experiment of Jondreville et al. (2017) to evaluate the accumulation of α-HBCDD in fast and slow-growing broilers from hatching to slaughter at 42 and 84 days of age, respectively. According to these data (Table S2.4), tissues total lipids concentrations are similar in the two strains, except for leg muscles. Besides, these concentrations are constant from hatching to slaughter, except for abdominal fat, the total lipids concentration of which linearly increases within 21 and 42 days in FG and SG broilers, respectively and remains constant up to slaughter. The proportion of neutral lipids (triglycerides + esterified cholesterol) in total lipids is similar in the two strains and is constant from hatching to slaughter.

Table S1.4: Parameters relative to the total lipids concentration in tissues and the proportion of neutral lipids in total lipids

| Tissue | Strain | References |  | SFD lipid conc age (day) |  | SFD lipid conc ini (kg kg-1) |  | Tissue lipid conc (kg kg-1) |  | a Tissue neut lipid (kg kg-1) |
| --- | --- | --- | --- | --- | --- | --- | --- | --- | --- | --- |
| Breast | FG&SG | Jondreville et al. (2017) |  |  |  |  |  | 0.0127 |  | 0.62 |
| Leg | FG | Jondreville et al. (2017) |  |  |  |  |  | 0.034 |  | 0.78 |
|  | SG |  |  |  |  |  | 0.054 |  |  |
| Liver | FG&SG | Jondreville et al. (2017) |  |  |  |  |  | 0.0535 |  | 0.55 |
| Blood | FG&SG | Rouckova et al. (2004); Baéza et al. (2015a and b); Jondreville et al. (2017) |  |  |  |  |  | 0.0040 |  | 0.32 |
| Abdominal fat (SFD) | FG | Jondreville et al. (2017) |  | 14 |  | 0.600 |  | 0.900 |  | 1 |
| SG |  | 28 |  | 0.400 |  |  |  |  |
| Skin | FG&SG | Nir et al. (1988); Grey et al. (1989) |  |  |  |  |  | 0.400 |  | 1 |

**SFD lipid conc age**, Age at which lipids concentration in separable fat depots gain stops increasing; **SFD gain lipid conc ini**, Initial concentration of lipids in separable fat depots; **Tissue lipid conc**, Total lipids concentration in the tissue; **a Tissue neut lipid**, proportion of neutral lipids in total lipids

## Hematocrit, perfusion rate of the tissues and cardiac blood flow

Data are presented in tables S1.5.

For lack of information in literature, we included data collected not only in broilers but also in layers. Mean values were used in the model.

Table S1.5: Blood haematocrit (Ht, %) and volumic mass (mVblood, g L-1) and to tissues perfusion rate (L kg-1 d-1)

| Tissue | Criteria | Unit | References | Strain | Data | |  | Min | Max | Mean | SD |
| --- | --- | --- | --- | --- | --- | --- | --- | --- | --- | --- | --- |
| Type | Number |  |
| Blood | Ht | % | Alimohamadi et al. (2014); Deaton et al. (1969); Shapiro et al. (1999); Wideman and Tackett (2000); Wideman et al. (1998, 1999) | Broilers FG | Means | 24 |  | 22.7 | 34.8 | 27.4 | 2.9 |
| Blood | mVblood | g L-1 | Medway and Kare (1959) | Layer | Means | 7 |  | 1.042 | 1.046 | 1.044 | 0.001 |
| Liver | Perfusion rate | L kg-1 d-1 | Boelkins et al. (1973); Merrill et al. (1981); Sapirstein and Hartman (1959); Weidner et al. (1982) ; Wolfenson et al. (1978, 1981); Wolfenson (1986) | Layer | Means | 7 |  | 778 | 1728 | 1133 | 374 |
| Breast | Perfusion rate | L kg-1 d-1 | Sapirstein and Hartman (1959); Wolfenson et al. (1978, 1981); Wolfenson (1986) | Layer | Means | 4 |  | 86 | 216 | 139 | 56 |
| Leg | Perfusion rate | L kg-1 d-1 | Sapirstein and Hartman (1959); Wolfenson et al. (1981); Wolfenson (1986) | Layer | Means | 3 |  | 137 | 216 | 190 | 46 |
| Skin | Perfusion rate | L kg-1 d-1 | Weidner et al. (1982); Wolfenson et al. (1978, 1981); Wolfenson (1986) | Layer | Means | 6 |  | 43 | 216 | 104 | 64 |

1The daily plasma flow to each tissue (Q tissue, L d-1) is calculated as its weight (W tissue, kg) multiplied by the tissue perfusion rate (Tissue perf, L d-1 kg-1), accounting for haematocrit:

Table S1.6: Parameters relative to cardiac plasma flow1

| References | Strain | Data | |  | a Q | | |  | b Q | | |
| --- | --- | --- | --- | --- | --- | --- | --- | --- | --- | --- | --- |
| Type | Number |
| Merrill et al. (1981); Moynihan and Edwards (1975); Niezgoda et al. (1982); Sapirstein and Hartman (1959); Stebel and Wideman (2008); Vogel and Sturkie (1963); Weidner et al. (1982); West et al. (2010); Wideman (1999); Wideman and Tackett (2000); Wideman et al. (1998, 1999, 2005); Wolfenson et al. (1981) | Broilers & layers | Means | 27 |  | 0.856 | ±0.175 | *** |  | 5.55 | ±0.14 | *** |

1 Cardiac blood flow is an allometric relationship of body weight (BW, kg) (Dzialowski and Crossley, 2015) and cardiac plasma flow (TQ, L d-1) is calculated accounting for haematocrit (Ht):

# S2: Sensitivity analysis

A local sensitivity analysis was implemented to evaluate the relative importance of some model parameters on assimilation efficiencies (AE, Table S3.1) and accumulations ratios in lipids (ARlip, Table S3.2).

The absolute value of the normalized sensitivity coefficient (NSC) was calculated to distinguish the relative importance of model parameters:

where *p* is the model parameter, *△p* is the variation in the model parameter, *r* is the model output, and *△r* is the variation in the model output. In this study, parameters varied according to different ranges selected by the expertise of the authors. A parameter was considered influential if NSC reached a minimum absolute value of 0.25 (Leavens et al., 2012). A positive NSC indicates that an increase (respectively a decrease) in the parameter implies an increase (respectively a decrease) of the output.

Table S2.1: Normalized sensitivity coefficient (NSC) for assimilation efficiencies (AE) in tissues for as-hatched fast-growing broilers1

| Parameter2 | Value | Variation range (%) | | AE | | | | | | | | |
| --- | --- | --- | --- | --- | --- | --- | --- | --- | --- | --- | --- | --- |
| Body | Breast | Leg | Plasma | Liver | Skin | SFD | Storage  fat | Other tissues |
| Growth and feed intake |  |  |  |  |  |  |  |  |  |  |  |  |
| BW2 | 2.90 | -20 | 20 | **0.32** | 0.18 | -0.01 | **-0.27** | **-0.37** | **0.81** | **0.81** | **0.81** | **-0.67** |
| a intake | 0.27 | -20 | 20 | 0.00 | 0.00 | 0.00 | 0.00 | 0.00 | 0.00 | 0.00 | 0.00 | 0.00 |
| a storagefat | 1.44 | -10 | 10 | -0.23 | 0.06 | 0.07 | 0.06 | 0.09 | **-1.45** | **-1.42** | **-1.43** | **2.26** |
| Prop Skin | 0.66 | -20 | 20 | -0.08 | 0.03 | 0.03 | 0.03 | 0.08 | **1.11** | **-1.99** | **-0.55** | **0.88** |
| Total lipids |  |  |  |  |  |  |  |  |  |  |  |  |
| a2 BL | 1.21 | -10 | 10 | **0.62** | **-0.98** | **-0.95** | **-0.98** | **-0.96** | **1.16** | **1.19** | **1.18** | **-0.30** |
| Breast lipid conc | 0.01 | -20 | 20 | 0.00 | **1.00** | 0.00 | 0.00 | 0.00 | 0.00 | 0.00 | 0.00 | -0.05 |
| Leg lipid conc | 0.03 | -20 | 20 | 0.00 | 0.00 | **1.03** | 0.00 | 0.00 | 0.00 | 0.00 | 0.00 | -0.10 |
| Plasma lipid conc | 0.00 | -20 | 20 | 0.03 | 0.03 | 0.03 | **1.03** | -0.01 | 0.03 | 0.03 | 0.03 | 0.03 |
| Liver lipid conc | 0.05 | -20 | 20 | **-0.54** | **-0.55** | **-0.54** | **-0.55** | **0.42** | **-0.54** | **-0.53** | **-0.54** | **-0.57** |
| Skin lipid conc | 0.40 | -20 | 20 | 0.07 | -0.02 | -0.03 | -0.02 | -0.07 | **1.01** | -0.05 | **0.44** | **-0.71** |
| SFD gain lipid conc fin | 0.90 | -20 | 10 | 0.08 | -0.02 | -0.03 | -0.02 | -0.07 | -0.05 | **0.98** | **0.50** | **-0.81** |
| Neutral lipids |  |  |  |  |  |  |  |  |  |  |  |  |
| a Breast neut lipid | 0.62 | -20 | 20 | 0.01 | **0.99** | -0.01 | -0.01 | 0.00 | -0.01 | -0.01 | -0.01 | -0.01 |
| a Leg neut lipid | 0.78 | -20 | 20 | 0.02 | -0.01 | **0.99** | -0.01 | -0.01 | -0.01 | -0.01 | -0.01 | -0.01 |
| a Plasma neut lipid | 0.32 | -20 | 20 | 0.03 | 0.03 | 0.02 | **1.03** | -0.01 | 0.02 | 0.02 | 0.02 | 0.03 |
| a Liver neut lipid | 0.55 | -20 | 20 | **-0.55** | **-0.56** | **-0.56** | **-0.56** | **0.43** | **-0.55** | **-0.55** | **-0.55** | **-0.56** |
| a Storagefat neut lipid | 1.00 | -20 | 0 | **0.33** | **-0.34** | **-0.34** | **-0.34** | **-0.34** | **0.70** | **0.70** | **0.70** | **-0.34** |
| a Other neut lipid | 0.80 | -20 | 20 | 0.17 | -0.11 | -0.12 | -0.11 | -0.08 | -0.13 | -0.14 | -0.13 | **0.88** |
| Irrigation of tissues |  |  |  |  |  |  |  |  |  |  |  |  |
| Prop Storagefatperf | 0.30 | -60 | 60 | 0.01 | -0.03 | -0.02 | -0.03 | -0.02 | 0.04 | 0.03 | 0.03 | -0.03 |
| Breast perf | 140 | -40 | 200 | 0.00 | 0.00 | 0.00 | 0.00 | 0.00 | 0.00 | 0.00 | 0.00 | 0.00 |
| Leg perf | 190 | -50 | 150 | 0.00 | 0.00 | 0.00 | 0.00 | 0.00 | 0.00 | 0.00 | 0.00 | 0.00 |
| Liver perf | 1200 | -40 | 50 | 0.02 | 0.03 | 0.03 | 0.03 | 0.00 | 0.02 | 0.01 | 0.02 | 0.03 |
| Skin perf | 100 | -60 | 100 | 0.00 | 0.00 | 0.00 | 0.00 | 0.00 | 0.01 | 0.00 | 0.00 | 0.00 |
| SFD perf | 100 | -60 | 100 | 0.00 | -0.01 | 0.00 | -0.01 | 0.00 | 0.00 | 0.01 | 0.01 | -0.01 |
| a Q | 0.86 | -10 | 10 | 0.00 | 0.00 | 0.00 | 0.00 | 0.00 | 0.00 | 0.00 | 0.00 | 0.01 |
| HBCDD |  |  |  |  |  |  |  |  |  |  |  |  |
| HBCDD abs coef | 0.90 | -20 | 10 | **1.00** | **1.00** | **1.00** | **1.00** | **1.00** | **1.00** | **1.00** | **1.00** | **1.00** |
| CLin | 9.60 | -30 | 30 | **-0.28** | **-0.28** | **-0.28** | **-0.28** | **-0.29** | **-0.28** | **-0.28** | **-0.28** | **-0.28** |
| CLip | 12.00 | -30 | 30 | **-0.28** | **-0.28** | **-0.28** | **-0.28** | **-0.29** | **-0.28** | **-0.27** | **-0.28** | **-0.28** |
| Diff Faeces coef | 200 | -50 | 100 | 0.00 | 0.00 | 0.00 | 0.00 | 0.00 | 0.00 | 0.00 | 0.00 | 0.00 |
| Diff Storagefat coef | 200 | -50 | 100 | 0.01 | -0.03 | 0.00 | -0.03 | -0.02 | 0.04 | 0.03 | 0.03 | -0.03 |
| Other parameters |  |  |  |  |  |  |  |  |  |  |  |  |
| Dig lipid | 0.84 | -10 | 10 | 0.01 | 0.01 | 0.01 | 0.01 | 0.01 | 0.01 | 0.01 | 0.01 | 0.01 |

1 Red: |NSC| ≥ 0.25; Blue: 0.1 ≤ |NSC| < 0.25; Black: : 0.05 ≤ |NSC| < 0.1; Grey: |NSC| < 0.05.

2 See Table 1 in the paper for the description of parameters.

3 Separable fat depots.

Table S2.2: Normalized sensitivity coefficient (NSC) for accumulation ratio in lipids of tissues (ARlip) for as-hatched fast-growing broilers1

| Parameter2 | Value | Variation range (%) | | ARlip | | | | | | | | |
| --- | --- | --- | --- | --- | --- | --- | --- | --- | --- | --- | --- | --- |
| Body | Breast | Leg | Plasma | Liver | Skin | SFD3 | Storage  fat | Other tissues |
| Growth and feed intake |  |  |  |  |  |  |  |  |  |  |  |  |
| BW2 | 2.90 | -20 | 20 | **-0.40** | **-0.62** | **-0.58** | **-0.62** | **-0.67** | **-0.44** | **-0.44** | **-0.44** | **-0.61** |
| a intake | 0.27 | -20 | 20 | **1.00** | **1.00** | **1.00** | **1.00** | **1.00** | **1.00** | **1.00** | **1.00** | **1.00** |
| a storagefat | 1.44 | -10 | 10 | -0.23 | 0.06 | 0.07 | 0.06 | 0.09 | 0.04 | 0.05 | 0.05 | 0.05 |
| Prop Skin | 0.66 | -20 | 20 | -0.08 | 0.03 | 0.03 | 0.03 | 0.08 | 0.11 | -0.05 | 0.03 | 0.01 |
| Total lipids |  |  |  |  |  |  |  |  |  |  |  |  |
| a2 BL | 1.21 | -10 | 10 | **-0.67** | **-0.98** | **-0.95** | **-0.98** | **-0.96** | **-0.69** | **-0.68** | **-0.68** | **-0.98** |
| Breast lipid conc | 0.01 | -20 | 20 | 0.00 | 0.00 | 0.00 | 0.00 | 0.00 | 0.00 | 0.00 | 0.00 | 0.00 |
| Leg lipid conc | 0.03 | -20 | 20 | 0.00 | 0.00 | 0.03 | 0.00 | 0.00 | 0.00 | 0.00 | 0.00 | 0.00 |
| Plasma lipid conc | 0.00 | -20 | 20 | 0.03 | 0.03 | 0.03 | 0.03 | -0.01 | 0.03 | 0.03 | 0.03 | 0.03 |
| Liver lipid conc | 0.05 | -20 | 20 | **-0.54** | **-0.55** | **-0.54** | **-0.55** | **-0.56** | **-0.54** | **-0.53** | **-0.54** | **-0.55** |
| Skin lipid conc | 0.40 | -20 | 20 | 0.07 | -0.02 | -0.03 | -0.02 | -0.07 | 0.01 | -0.05 | -0.02 | -0.01 |
| SFD gain lipid conc fin | 0.90 | -20 | 10 | 0.08 | -0.02 | -0.03 | -0.02 | -0.07 | -0.05 | -0.01 | -0.03 | -0.01 |
| Neutral lipids |  |  |  |  |  |  |  |  |  |  |  |  |
| a Breast neut lipid | 0.62 | -20 | 20 | 0.01 | **0.99** | -0.01 | -0.01 | 0.00 | -0.01 | -0.01 | -0.01 | -0.01 |
| a Leg neut lipid | 0.78 | -20 | 20 | 0.02 | -0.01 | **0.99** | -0.01 | -0.01 | -0.01 | -0.01 | -0.01 | -0.01 |
| a Plasma neut lipid | 0.32 | -20 | 20 | 0.03 | 0.03 | 0.02 | **1.03** | -0.01 | 0.02 | 0.02 | 0.02 | 0.03 |
| a Liver neut lipid | 0.55 | -20 | 20 | **-0.55** | **-0.56** | **-0.56** | **-0.56** | **0.43** | **-0.55** | **-0.55** | **-0.55** | **-0.56** |
| a Storagefat neut lipid | 1.00 | -20 | 0 | **0.33** | **-0.34** | **-0.34** | **-0.34** | **-0.34** | **0.70** | **0.70** | **0.70** | **-0.34** |
| a Other neut lipid | 0.80 | -20 | 20 | 0.17 | -0.11 | -0.12 | -0.11 | -0.08 | -0.13 | -0.14 | -0.13 | **0.88** |
| Irrigation of tissues |  |  |  |  |  |  |  |  |  |  |  |  |
| Prop Storagefatperf | 0.30 | -60 | 60 | 0.01 | -0.03 | -0.02 | -0.03 | -0.02 | 0.04 | 0.03 | 0.03 | -0.03 |
| Breast perf | 140 | -40 | 200 | 0.00 | 0.00 | 0.00 | 0.00 | 0.00 | 0.00 | 0.00 | 0.00 | 0.00 |
| Leg perf | 190 | -50 | 150 | 0.00 | 0.00 | 0.00 | 0.00 | 0.00 | 0.00 | 0.00 | 0.00 | 0.00 |
| Liver perf | 1200 | -40 | 50 | 0.02 | 0.03 | 0.03 | 0.03 | 0.00 | 0.02 | 0.01 | 0.02 | 0.03 |
| Skin perf | 100 | -60 | 100 | 0.00 | 0.00 | 0.00 | 0.00 | 0.00 | 0.01 | 0.00 | 0.00 | 0.00 |
| SFD perf | 100 | -60 | 100 | 0.00 | -0.01 | 0.00 | -0.01 | 0.00 | 0.00 | 0.01 | 0.01 | -0.01 |
| a Q | 0.86 | -10 | 10 | 0.00 | 0.00 | 0.00 | 0.00 | 0.00 | 0.00 | 0.00 | 0.00 | 0.01 |
| HBCDD |  |  |  |  |  |  |  |  |  |  |  |  |
| HBCDD abs coef | 0.90 | -20 | 10 | **1.00** | **1.00** | **1.00** | **1.00** | **1.00** | **1.00** | **1.00** | **1.00** | **1.00** |
| CLin | 9.60 | -30 | 30 | **-0.28** | **-0.28** | **-0.28** | **-0.28** | **-0.29** | **-0.28** | **-0.28** | **-0.28** | **-0.28** |
| CLip | 12.00 | -30 | 30 | **-0.28** | **-0.28** | **-0.28** | **-0.28** | **-0.29** | **-0.28** | **-0.27** | **-0.28** | **-0.28** |
| Diff Faeces coef | 200 | -50 | 100 | 0.00 | 0.00 | 0.00 | 0.00 | 0.00 | 0.00 | 0.00 | 0.00 | 0.00 |
| Diff Storagefat coef | 200 | -50 | 100 | 0.01 | -0.03 | 0.00 | -0.03 | -0.02 | 0.04 | 0.03 | 0.03 | -0.03 |
| Other parameters |  |  |  |  |  |  |  |  |  |  |  |  |
| Dig lipid | 0.84 | -10 | 10 | 0.01 | 0.01 | 0.01 | 0.01 | 0.01 | 0.01 | 0.01 | 0.01 | 0.01 |

1 Red: |NSC| ≥ 0.25; Blue: 0.1 ≤ |NSC| < 0.25; Black: : 0.05 ≤ |NSC| < 0.1; Grey: |NSC| < 0.05.

2 See Table 1 in the paper for the description of parameters.

3 Separable fat depots.

# S3: Evaluation of the model

Once the parameters were adjusted, the model was evaluated based on the experimental data (Jondreville et al., 2017; Omer et al., 2017). Results are presented in Figure S3.1 and Table 3.2.

Figure S3.1: Simulated and observed α-HBCDD concentration1 and enantiomeric fraction (EF)2 in tissues of slow-growing (SG) and fast-growing (FG) broilers3. Parameters of the linear regressions Simulated vs. Observed are given in Table 3.2.

Values are means ± standard deviation (n=4) in all tissues except in plasma (n=1 pool).

1Expressed as ng g-1 lipid weight (from Jondreville et al., 2017).

2Calculated as the concentration de (+)-α-HBCDD divided by the sum (+)-α- and (-)-α- HBCDD (from Omer et al., 2017).

3Broilers are exposed through a 38 ng g-1 α-HBCDD feed. A: SG broilers were exposed during 84 days or exposed during 42 days and decontaminated during 42 days; B: FG broilers were exposed during 42 days.

A – Slow-growing broilers

B – Fast-growing broilers

| Regression line | 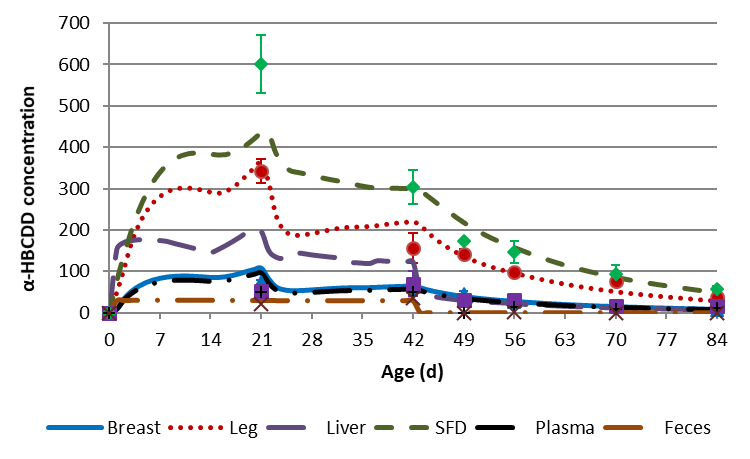 |
| --- | --- |
| Observations |  |

Table S3.2: Parameters1 of the linear relationship between simulated and observed α-HBCDD concentration2 and enantiomeric fraction (EF)3 in tissues of slow-growing (SG) and fast-growing (FG) broilers.

| α-HBCDD concentration | | | | | |  | EF | | | | | |
| --- | --- | --- | --- | --- | --- | --- | --- | --- | --- | --- | --- | --- |
| **SG4** | | | | | | | | | | | | |
|  | a | | *P* | RSD | R² |  |  | a | | P | RSD | R² |
| Breast | 1.05 | ±0.09 | <0.001 | 15 | 0.88 |  | Breast | 0.980 | ±0.007 | *<0.001* | 0.01 | 0.81 |
| Leg | 1.06 | ±0.08 | <0.001 | 47 | 0.94 |  | Leg | 0.982 | ±0.004 | *<0.001* | 0.01 | 0.89 |
| Plasma | 1.64 | ±0.12 | <0.001 | 11 | 0.79 |  | Plasma | 0.985 | ±0.016 | *<0.001* | 0.02 | 0.45 |
| Liver | 1.83 | ±0.30 | <0.001 | 45 | 0.66 |  | Liver | 0.989 | ±0.012 | *<0.001* | 0.02 | 0.93 |
| SFD | 0.90 | ±0.06 | <0.001 | 50 | 0.94 |  | SFD | 0.991 | ±0.005 | *<0.001* | 0.01 | 0.90 |
| **FG4** | | | | | | | | | | | | | |
|  | a | | *P* | RSD | R² |  |  | a | | *P* | RSD | R² |
| Breast | 0.82 | ±0.05 | *<0.01* | 5.4 | 0.98 |  | Breast | 1.008 | ±0.006 | *<0.001* | 0.01 | 0.99 |
| Leg | 0.79 | ±0.16 | *0.05* | 59 | 0.74 |  | Leg | 1.004 | ±0.004 | *<0.001* | 0.00 | 1.00 |
| Plasma | 1.07 | ±0.19 | *0.03* | 13 | 0.80 |  | Plasma | 1.026 | ±0.016 | *<0.001* | 0.01 | 0.81 |
| Liver | 1.38 | ±0.60 | *0.15* | 69 | 0.90 |  | Liver | 1.019 | ±0.012 | *<0.001* | 0.01 | 0.97 |
| SFD | 0.90 | ±0.05 | *<0.01* | 23 | 0.98 |  | SFD | 1.006 | ±0.004 | *<0.001* | 0.00 | 0.99 |

1Simulated = a × Observed; P, probability; RSD, residual standard deviation; R², coefficient of determination

2Expressed as ng g-1 lipid weight (from Jondreville et al., 2017)

3Calculated as the concentration de (+)-α-HBCDD divided by the sum (+)-α- and (-)-α- HBCDD (from Omer et al., 2017)

4Broilers are exposed through a 38 ng g-1 α-HBCDD feed. SG broilers were exposed during 84 days or exposed during 42 days and decontaminated during 42 days; FG broilers were exposed during 42 days.

# S4: Comparison of the two strains

According to production statistics, FG-broilers at slaughter are aged 35 to 55 days and weigh 1.8 to 3.4 kg, while FG-broilers are aged 81 to 95 days and weigh 1.9 to 3.5 kg (A. Travel, pers. comm.). The statistics also provide feed efficiency (FE, defined as the ratio of BW at slaughter to feed ingested) intervals (0.44 to 0.69, and 0.25 to 0.48 in FG- and SG-broilers respectively). Once BW and age at slaughter are introduced in the model, feed ingested and, in turn, FE can be calculated. The pairs of age and BW at slaughter leading to FE outside the ranges were discarded. The resulting ranges are presented in Table S4.1. The animals were exposed through feed from hatching to slaughter.

Table S4.1. Main characteristics of fast- (FG) and slow-growing (SG) broilers at slaughter1.

|  |  | FG | |  | SG | |
| --- | --- | --- | --- | --- | --- | --- |
|  |  | Min | Max |  | Min | Max |
| Age (day) |  | 36 | 54 |  | 81 | 95 |
| Body weight (kg) |  | 1.8 | 3.4 |  | 1.9 | 3.5 |
| Body lipids (g kg-1 BW) |  | 111 | 127 |  | 131 | 153 |
| Feed intake (kg) |  | 2.86 | 6.86 |  | 5.71 | 8.74 |
| Feed efficiency |  | 0.444 | 0.688 |  | 0.262 | 0.470 |

1 As hatched (Production statistics)

Figure S4.2. Accumulation ratio (ARlip)1 of α-HBCDD in tissues of fast- (FG) and slow-growing (SG) broilers2 according to their age (Age, day) and body weight (BW, kg) at slaughter.

**ARlip Breast (FG)** = 1.05 + 0.0252 × Age - 0.315 × BW

**ARlip Breast (SG)** = 1.75 + 0.00756 × Age - 0.616 × BW + 0.0538 × BW²

**ARlip Leg (FG)** = 3.80 + 0.0802 × Age - 1.03 × BW

**ARlip Leg (SG)** = 6.04 + 0.0240 × Age - 2.05 × BW + 0.179 × BW²

**ARlip Skin (FG)** = 6.23 + 0.0869 × Age - 1.62 × BW + 0.0961 × BW²

**ARlip Skin (SG)** = 7.85 + 0.0258 × Age - 2.26 × BW + 0.187 × BW²

1Ratio of the concentration of α-HBCDD in the tissue (µg kg-1 lipid weight) to its concentration in feed (µg kg-1)

2The characteristics of the broilers are detailed in Table 3. They were exposed through feed from hatching to slaughter.

# S5: Impact of the duration and source of α-HBCDD exposure

Figure S5.1. Simulated kinetics of α-HBCDD burden (µg) in Breast, Leg and Skin of fast-growing broilers1 ingesting 172 µg α-HBCDD according to different modalities of exposure2.

1As hatched; age at slaughter, 42 d; body weight at slaughter, 2.9 kg

2Exposure through the daily ingestion of 57.3 µg α-HBCDD during 3 days from 12 to 14 (A), 19 to 21 (B) or 26 to 28 (C) days of age

# References

Aderibigbe OB, Sogunle OM, Egbeyale LT, Abiola SS, Ladokun OA, Ajayi OL. 2013. Pelletized feed of different particle sizes: Effects on performance, carcass characteristics and intestinal morphology of two strains of broiler chicken. Pertanika Journal of Tropical Agricultural Science.36:127-144.

Alimohamadi K, Taherpour K, Ghasemi HA, Fatahnia F. 2014. Comparative effects of using black seed (Nigella sativa), cumin seed (Cuminum cyminum), probiotic or prebiotic on growth performance, blood haematology and serum biochemistry of broiler chicks. Journal of Animal Physiology and Animal Nutrition.98:538-546.

Alleman F, Michel J, Chagneau AM, Leclercq B. 2000. The effects of dietary protein independent of essential amino acids on growth and body composition in genetically lean and fat chickens. British Poultry Science.41:214-218.

Alnahhas N, Berri C, Chabault M, Chartrin P, Boulay M, Bourin MC, Le Bihan-Duval E. 2016. Genetic parameters of white striping in relation to body weight, carcass composition, and meat quality traits in two broiler lines divergently selected for the ultimate pH of the pectoralis major muscle. Bmc Genetics.17:1-9.

Baéza E, Gondret F, Chartrin P, Le Bihan-Duval E, Berri C, Gabriel I, Narcy A, Lessire M, Métayer-Coustard S, Collin A, Jegou, M, Lagarrigue, S, Duclos, M-J. 2015a. The ability of genetically lean or fat slow-growing chickens to synthesize and store lipids is not altered by the dietary energy source. Animal.9:1643-1652.

Baéza E, Jegou M, Gondret F, Lalande-Martin J, Tea I, Le Bihan-Duval E, Berri C, Collin A, Metayer-Coustard S, Louveau I, et al. 2015b. Pertinent plasma indicators of the ability of chickens to synthesize and store lipids. Journal of Animal Science. 93:107-116.

Boelkins JN, Mueller WJ, Hall KL. 1973. Cardiac output distribution in the laying hen during shell formation. Comparative Biochemistry and Physiology Part A: Physiology. 46:735-743.

Carrasco S, Bellof G, Schmidt E. 2014. Nutrients deposition and energy utilization in slow-growing broilers fed with organic diets containing graded nutrient concentration. Livestock Science.161:114-122.

Cherry J, Nir I, Jones DE, Dunnington EA, Nitsan Z, Siegel PB. 1987. Growth associated traits in parental and F1 populations of chickens under different feeding programs. 1. Ad libitum feeding. Poultry Science.66:1-9.

Cobb-Vantress, 2017. Broiler performance and nutrition supplement – Cobb 500. <http://www.cobb-vantress.com/products/cobb-500>

Crespo N, Esteve-Garcia E. 2002. Dietary polyinsaturated fatty acids decrease fat deposition in seperable fat depots but not in remainder carcass. Poultry Science.81:512-518.

Danisman R, Gous RM. 2013. Effect of dietary protein on performance of four broiler strains and on the allometric relationships between carcass portions and body protein. South African Journal of Animal Science.43:25-37.

Deaton JW, Reece FN, Tarver WJ. 1969. Hematocrit, hemoglobin and plasma-protein levels of broilers reared under constant temperatures. . Poultry Science.48:1993-1996.

Dzialowsli EM, Crossley DA. 2015. The cadiovascular system. In: Sturkie's Avian Physiology. Sixth ed. Scanes CG (Ed.), New York: Elsevier Academic Press. p. 193-284.

Eleroglu H, Yildirim A, Sekeroglu A, Duman M. 2014. Comparison of the growth performance and carcass characteristics of two slow-growing broiler genotypes fed diets supplemented with dry oregano (Origanum vulgare L.) or lemon balm (Melissa officinalis L.) leaves under the organic system. Journal of the Faculty of Veterinary Medicine, Kafkas University.20:49-58.

Fanatico AC, Pillai PB, Cavitt LC, Owens CM, Emmert JL. 2005. Evaluation of slower-growing broiler genotypes grown with and without outdoor access: growth performance and carcass yield. Poultry Science.84:1321–1327.

Gereart PA, Macleod MG, Larbier M, Leclercq B. 1990. Nitrogen metabolism in genetically fat and lean chickens. Poultry Science.69:1911-1921.

Gereart PA, Guillaumin S, Leclercq B. 1993. Are genetically lean broilers more resistant to hot climate? British Poultry Science.34:643-653.

Grey TC, Robinson D, Jones JM, Stock SW, Thomas NL. 1984. Effect of age and sex on the chemical-composition of edible offal and blood from broilers. British Poultry Science. 1984;25:83-90.

Grisoni ML, Larbier M, Uzu G, Gereart PA. 1990. Effect of dietary protein level on lipid deposition in broilers during the finshing period. Annales de Zootechnie.39:179-186.

Haitook T. 2006. Study on chicken meat production for small-scale farmers in northeast Thailand. Journal of Agriculture and Rural Development in the Tropics and Subtropics.Suppl. 87:1-164.

Henn JD, Bockor L, Ribeiro AML, Coldebella A, Kessler AD. 2014. Growth and deposition of body components of intermediate and high performance broilers. Brazilian Journal of Poultry Science.16:319-328.

Jondreville C, Cariou R, Meda B, Dominguez-Romero E, Omer E, Dervilly-Pinel G, Le Bizec B, Travel A, Baeza E. 2017. Accumulation of alpha-hexabromocyclododecane (alpha-HBCDD) in tissues of fast- and slow-growing broilers (Gallus domesticus). Chemosphere.178:424-431.

Küçükyılmaz K, Bozkurt M, Çınar M, Çatlı AU, Bintaş E, Erkek R. 2014. The effects of an organic rearing system and dietary supplementation of an essential oil mixture on performance and meat yield of slow-growing broilers in two seasons. South African Journal of Animal Science.44:360-370.

Leavens T, Tell L, Clothier K, Griffith R, Baynes R, Riviere J. 2012. Development of a physiologically based pharmacokinetic model to predict tulathromycin distribution in goats. Journal of Veterinary

Pharmacology and Therapeutics. 35:121-131.

Leclercq B. 1983. The influence of dietary protein content on the performance of genetically lean or fat growing chickens. British Poultry Science.24:581-587.

Méda B, Fortun-Lamothe L, Hassouna M. 2014. Prediction of nutrient flows with potential impacts on the environment in a rabbit farm: a modelling approach. Animal Production Science. 54:2042-2051.

Méda B, Dusart L, Lessire M, Hallouis J-M, Bordeau T, Souchet C, Mercerand F, Hatté C, Bouvarel I, Berri C., 2015. Remplacement du tourteau de soja par des matières premières riches en protéines : évaluation multicritère chez le poulet de chair de type Label. Proceedings of the Journées de la Recherche Avicole et Palmipèdes à Foie Gras; 25 - 26 mars 2015, Tours, France.

Medway W, Kare MR. 1959. Blood and plasma volume, hematocrit, blood specific gravity and serum protein electrophoresis of the chicken. Poultry Science.38:624-631.

Merrill GF, Russo RE, Halper JM. 1981. Cardiac output distribution before and after endotoxin challenge in the rooster. American Journal of Physiology.241:R67-R71.

Moynihan JB, Edwards NA. 1975. Blood flow in the reproductive tract of the domestic hen. Comparative Biochemistry and Physiology Part A:Physiology.51:745-748.

Niezgoda J, Pierzchala K, Bobek S. 1982. Blood flow through the reproductive organs in the hen during the maturation period and egg-laying cycle. Zentralblatt für Veterinärmedizin Reihe A.29:207-214.

Nir I, Nitsan Z, Keren-Zvi S. 1988. Fat deposition in birds. In: Leanness in domestic birds Genetic, metabolic and hormonal aspects. Butterworth & Co Ltd - INRA. p. 141-174.

Omer E, Cariou R, Huneau-Salaün A, Dervilly-Pinel G, Baéza É, Travel A, Le Bouquin S, Jondreville C, Le Bizec B. 2017. Enantiomer-specific accumulation and depuration of α-hexabromocyclododecane (α-HBCDD) in chicken (Gallus gallus) as a tool to identify contamination sources. Chemosphere. 180:365-372.

Pym RAE, Leclercq B, Thomas FM, Tesseraud S. 2004. Protein utilisation and turnover in lines of chickens selected for different aspects of body composition. British Poultry Science.45:775-786.

Ricard FH, Leclercq B, Touraille C. 1983. Selecting broilers for low or high abdominal fat: distribution of carcass fat and quality of meat. British Poultry Science.24:511-516.

Rouckova J, Trckova M, Herzig I. 2004. The use of amaranth grain in diets for broiler chickens and its effect on performance and selected biochemical indicators. Czech Journal of Animal Science.49:532-541.

Sapirstein LA, Hartman FA. 1959. Cardiac output and its distribution in the chicken. . American Journal of Physiology.196:751-752.

SARL Willems, 2017. Performances de poulets de souches JA567. <http://poussins-willems.com/performances657.htm>

Shahin KA, Abd Elazeem F. 2005. Effects of breed, sex and diet and their interactions on carcass composition and tissue weight distribution of broiler chickens. Archiv für Tierzucht. 48:612-626.

Shapiro F, Nir I, Shinder D, Silanikove N. 1999. Stunting syndrome in broilers: effect of electrolytes in drinking water on performance and intestinal glucose transport. British Poultry Science.40:501-510.

Stebel S, Wideman RF. 2008. Pulmonary hemodynamic responses to intravenous prostaglandin E2 in broiler chickens. Poultry Science.87:138-115.

Tickle PG, Paxton H, Rankin JW, Hutchinson JR, Codd JR. 2014. Anatomical and biomechanical traits of broiler chickens across ontogeny. Part I. Anatomy of the musculoskeletal respiratory apparatus and changes in organ size. PeerJ.3;2:e432.

Vogel JA, Sturkie PD. 1963. Cardiovascular responses of the chicken to seasonal and induced temperature changes. Science.140:1404-1406.

Wang XQ, Chen X, Tan HZ, Zhang DX, Zhang HJ, Wei S, Yan HC. 2013. Nutrient density and slaughter age have differential effects on carcase performance, muscle and meat quality in fast and slow growing broiler genotypes. British Poultry Science.54:50-61.

Weidner WJ, Hoffman LF, Clark SD. 1982. Regional blood flow in the domestic fowl immediately following chronic acceleration. Aviation, Space, and Environmental Medicine.53:666-669.

West JB, Fu Z, Gu Y, Wagner HE, Carr JA, Peterson KL. 2010. Pulmonary artery pressure responses to increased cardiac output in chickens with raised metabolic rate. Comparative Biochemistry and Physiology Part A: Molecular & Integrative Physiology.156:430-435.

Wideman RF. 1999. Cardiac output in four-, five-, and six-week-old broilers, and hemodynamic responses to intravenous injections of epinephrine. Poultry Science.78:392-403.

Wideman RF, Chapman ME, Erf GF. 2005. Pulmonary and systemic hemodynamic responses to intravenous prostacyclin in broilers. Poultry Science.84:442-453.

Wideman RF, Kirby YK, Forman MF, Marson N, McNew RW, Owen RL. 1998. The infusion rate dependent influence of acute metabolic acidosis on pulmonary vascular resistance in broilers. Poultry Science.77:309-321.

Wideman RF, Maynard P, Bottje WG. 1999. Venous blood pressure in broilers during acute inhalation of five percent carbon dioxide or unilateral pulmonary artery occlusion Poultry Science.78:1443-1451.

Wideman RF, Tackett CD. 2000. Cardio-pulmonary function in broilers reared at warm or cool temperatures: Effect of acute inhalation of 100% oxygen. Poultry Science.79:257-264.

Wolfenson D. 1986. The effect of acclimatization on blood flow and its distribution in normothermic and hyperthermic domestic fowl. Comparative Biochemistry and Physiology Part A: Physiology 85:739-742.

Wolfenson D, Berman A, Frei YF, Snapir N. 1978. Measurement of blood flow distribution by radioactive microspheres in the laying hen (Gallus domesticus). Comparative Biochemistry and Physiology Part A: Physiology.61:549-554.

Wolfenson D, Frei YF, Snapir N, Berman A. 1981. Heat stress effects on capillary blood flow and its redistribution in the laying hen. Pflügers Archiv.390:86-93.
